# Supplementary material for: Comparative Assessment of Habitat Suitability and Niche Overlap of Three Cytospora Species in China
Source: MDPI journal article supplement (doi:10.3390/jof10010038), 2024-01-03
Supplement: s1 [file s1]

**Table S9. Percentage of distribution changes of *C.mali* between current and future climate-change scenarios**

| Scenario | Period | Extended area ( $\times 10^4/\text{km}^2$ ) | Shrink area ( $\times 10^4/\text{km}^2$ ) | Stable area ( $\times 10^4/\text{km}^2$ ) |
|----------|--------|---------------------------------------------|-------------------------------------------|-------------------------------------------|
| Current  |        |                                             |                                           |                                           |
| SSP126   | 2030S  | 21.274                                      | 1.477                                     | 50.168                                    |
|          | 2050S  | 21.299                                      | 7.069                                     | 44.576                                    |
|          | 2070S  | 23.324                                      | 2.962                                     | 48.684                                    |
|          | 2090S  | 23.451                                      | 4.107                                     | 47.538                                    |
| SSP370   | 2030S  | 2.441                                       | 1.168                                     | 50.477                                    |
|          | 2050S  | 27.495                                      | 4.087                                     | 47.558                                    |
|          | 2070S  | 49.373                                      | 10.082                                    | 41.563                                    |
|          | 2090S  | 57.983                                      | 9.268                                     | 42.377                                    |
| SSP585   | 2030S  | 27.014                                      | 1.003                                     | 50.642                                    |
|          | 2050S  | 36.954                                      | 6.238                                     | 45.407                                    |
|          | 2070S  | 45.572                                      | 9.945                                     | 41.7                                      |
|          | 2090S  | 61.746                                      | 11.324                                    | 40.322                                    |
