# Supplementary material for: Comparative Assessment of Habitat Suitability and Niche Overlap of Three Cytospora Species in China
Source: MDPI journal article supplement (doi:10.3390/jof10010038), 2024-01-03
Supplement: s1 [file s1]

**Table S10. Percentage of distribution changes of *C. nivea* between current and future climate-change scenarios**

| Scenario | Period  | Extended area ( $\times 10^4/\text{km}^2$ ) | Shrink area ( $\times 10^4/\text{km}^2$ ) | Stable area ( $\times 10^4/\text{km}^2$ ) |
|----------|---------|---------------------------------------------|-------------------------------------------|-------------------------------------------|
| SSP126   | Current |                                             |                                           |                                           |
|          | 2030S   | 9.758                                       | 4.341                                     | 27.878                                    |
|          | 2050S   | 24.085                                      | 3.37                                      | 28.848                                    |
|          | 2070S   | 13.376                                      | 2.896                                     | 29.322                                    |
| SSP370   | 2090S   | 13.67                                       | 3.811                                     | 28.407                                    |
|          | 2030S   | 5.144                                       | 9.902                                     | 22.316                                    |
|          | 2050S   | 27.599                                      | 2.661                                     | 29.558                                    |
|          | 2070S   | 31.866                                      | 4.198                                     | 28.019                                    |
| SSP585   | 2090S   | 45.409                                      | 2.599                                     | 29.619                                    |
|          | 2030S   | 19.197                                      | 3.193                                     | 29.026                                    |
|          | 2050S   | 19.149                                      | 4.115                                     | 28.103                                    |
|          | 2070S   | 27.623                                      | 4.596                                     | 27.622                                    |
|          | 2090S   | 32.555                                      | 5.078                                     | 27.14                                     |
