# Supplementary material for: Comparative Assessment of Habitat Suitability and Niche Overlap of Three Cytospora Species in China
Source: MDPI journal article supplement (doi:10.3390/jof10010038), 2024-01-03
Supplement: s1 [file s1]

**Table S7. Dynamics of changes in distribution area of *C. nivea* under different climate scenarios**

| Climate scenarios |        | Not suitable area/% | Low suitable area/% | Moderately suitable area/% | Highly suitable area/% | Total suitable area/% |
|-------------------|--------|---------------------|---------------------|----------------------------|------------------------|-----------------------|
| Current climate   |        | 70.87               | 22.03               | 5.46                       | 1.64                   | 29.13                 |
| 2021-2040         | SSP126 | 68.83               | 22.83               | 6.76                       | 1.58                   | 31.17                 |
|                   | SSP370 | 70.39               | 22.71               | 5.72                       | 1.17                   | 29.6                  |
|                   | SSP585 | 66.48               | 22.81               | 8.45                       | 2.26                   | 33.52                 |
|                   | SSP126 | 67.61               | 21.67               | 8.1                        | 2.62                   | 32.39                 |
| 2041–2060         | SSP370 | 67.02               | 22.47               | 7.95                       | 2.57                   | 32.99                 |
|                   | SSP585 | 70.79               | 19.77               | 6.93                       | 2.5                    | 29.2                  |
|                   | SSP126 | 68.64               | 22.39               | 6.97                       | 2                      | 31.36                 |
|                   | SSP370 | 59.13               | 28.71               | 9.78                       | 2.39                   | 40.88                 |
| 2061–2080         | SSP585 | 62.94               | 26.39               | 8.63                       | 2.03                   | 37.05                 |
|                   | SSP126 | 70.2                | 21.71               | 6.24                       | 2.39                   | 30.34                 |
|                   | SSP370 | 58.16               | 27.03               | 10.65                      | 4.16                   | 41.84                 |
|                   | SSP585 | 61.42               | 26.61               | 8.81                       | 3.16                   | 38.58                 |
| Mean              |        | 66.34               | 23.63               | 7.73                       | 2.34                   | 33.70                 |
