# Supplementary material for: Comparative Assessment of Habitat Suitability and Niche Overlap of Three Cytospora Species in China
Source: MDPI journal article supplement (doi:10.3390/jof10010038), 2024-01-03
Supplement: s1 [file s1]

**Figure 1.** Global Occurrence records of three studied species. The pink, green and black dots represent *C. chrysosperma*, *C. mali* and *C. nivea*, respectively.

**Figure 2.** The receiver operating characteristic curve for target species. A, B and C represent *C. chrysosperma*, *C. mali* and *C. nivea*, respectively.

**Figure 3.** The current potentially geographical distribution for three studied species in China. A, B and C represent *C. chrysosperma* (no suitability  $p \leq 0.2812$ ; low suitability  $0.2812 < p \leq 0.4$ ; medium suitability  $0.4 < p \leq 0.6$ ; high suitability  $p > 0.6$ ,  $p$  = probability), *C. mali* (no suitability  $p \leq 0.0887$ ; low suitability  $0.0887 < p \leq 0.4$ ; medium suitability  $0.4 < p \leq 0.6$ ; high suitability  $p > 0.6$ ,  $p$  = probability) and *C. nivea* (no suitability  $p \leq 0.1184$ ; low suitability  $0.1184 < p \leq 0.4$ ; medium suitability  $0.4 < p \leq 0.6$ ; high suitability  $p > 0.6$ ,  $p$  = probability), respectively.

**Figure 4.** Centroid shifts of potential suitable area for three studied species under different climatic scenarios in China. Red star indicates the centroids of the suitable habitats of each species under current climate. Dots and triangles represent the centroids of the suitable habitats of each species under different future climate scenarios. A, B and C represent *C. chrysosperma*, *C. mali* and *C. nivea*, respectively.

**Figure 5.** Niche and range overlap of the potential distribution habitat of the three species.

**Table 1.** Results of MaxEnt models with optimized parameters developed for three studied species.

**Table 2.** Centroid migration of suitable areas under future climatic conditions for target species

**Table 3.** Niche and range overlap of the potential distribution habitat of the three species

## SUPPLEMENTARY MATERIALS

**Figure S1** Correlation analysis of various environmental factors

**Figure S2** Jackknife test of variable importance Regularized training gain

**Figure S3** Response curves for predictions in MaxEnt model

**Figure S4** The future potentially geographical distributions of *C. chrysosperma* in China under future climatic conditions

**Figure S5** The future potentially geographical distributions of *C. mali* in China under future climatic conditions

**Figure S6** The future potentially geographical distributions of *C. nivea* in China under future climatic conditions

**Figure S7** Adaptability changes in *C. chrysosperma* under different future climate scenarios

**Figure S8** Adaptability changes in *C. mali* under different future climate scenarios

**Figure S9** Adaptability changes in *C. nivea* under different future climate scenarios

**Table S1** Geographical distributions of *C. chrysosperma*, *C. mali* and *C. nivea* species sampled in this study

**Table S2** Environmental variables for current period model analysis

**Table S3** List of selected environmental variables for each species

**Table S4** Key climatic factors influencing habitat distribution of three species

**Table S5** Dynamics of changes in distribution area of *C. chrysosperma* under different climate scenarios

**Table S6** Dynamics of changes in distribution area of *C. mali* under different climate scenarios

**Table S7** Dynamics of changes in distribution area of *C. nivea* under different climate scenarios

**Table S8** Percentage of distribution changes of *C. chrysosperma* between current and future climate-change scenarios

**Table S9** Percentage of distribution changes of *C. mali* between current and future climate-change scenarios

**Table S10** Percentage of distribution changes of *C. nivea* between current and future climate-change scenarios
