# Supplementary material for: Comparative Assessment of Habitat Suitability and Niche Overlap of Three Cytospora Species in China
Source: MDPI journal article supplement (doi:10.3390/jof10010038), 2024-01-03
Supplement: s1 [file s1]

**Table S5. Dynamics of changes in distribution area of *C. chrysosperma* under different climate scenarios**

| Climate scenarios |        | Not suitable area/% | Low suitable area/% | Moderately suitable area/% | Highly suitable area/% | Total Suitable area/% |
|-------------------|--------|---------------------|---------------------|----------------------------|------------------------|-----------------------|
| Current climate   |        | 62.26               | 9.54                | 12.43                      | 15.78                  | 37. 75                |
| 2021-2040         | SSP126 | 59.36               | 8.74                | 15.75                      | 16.16                  | 40. 65                |
|                   | SSP370 | 62.42               | 9.18                | 13.21                      | 15.19                  | 37. 58                |
|                   | SSP585 | 57.52               | 9.4                 | 14.88                      | 18.2                   | 42. 48                |
| 2041–2060         | SSP126 | 61.36               | 8.15                | 13.72                      | 16.77                  | 38. 64                |
|                   | SSP370 | 58.37               | 9.85                | 16.36                      | 15.42                  | 41. 63                |
|                   | SSP585 | 59.63               | 9.37                | 14.16                      | 16.84                  | 40. 37                |
| 2061–2080         | SSP126 | 64.11               | 8.88                | 12.66                      | 14.35                  | 35. 89                |
|                   | SSP370 | 55.49               | 10.37               | 18.47                      | 15.67                  | 44. 51                |
|                   | SSP585 | 60.11               | 9.45                | 17.41                      | 13.03                  | 39. 89                |
| 2081–2100         | SSP126 | 64.14               | 7.94                | 12.71                      | 15.2                   | 35. 85                |
|                   | SSP370 | 57.98               | 12.14               | 19.82                      | 10.07                  | 42. 03                |
|                   | SSP585 | 62.3                | 9.06                | 18.16                      | 10.48                  | 37. 7                 |
| Mean              |        | 60.39               | 9.39                | 15.36                      | 14.86                  | 39.61                 |
