# Supplementary material for: Comparative Assessment of Habitat Suitability and Niche Overlap of Three Cytospora Species in China
Source: MDPI journal article supplement (doi:10.3390/jof10010038), 2024-01-03
Supplement: s1 [file s1]

Table S1. Geographical distributions of *C. chrysosperma*, *C. mali* and *C. nivea* species sampled in this study

| Species                | Longitude (°) | Latitude (°) | Species                | Longitude (°) | Latitude (°) |
|------------------------|---------------|--------------|------------------------|---------------|--------------|
| <i>C. chrysosperma</i> | -0.520833     | 50.854167    | <i>C. chrysosperma</i> | 112.729167    | 35.104167    |
| <i>C. chrysosperma</i> | -0.895833     | 39.604167    | <i>C. chrysosperma</i> | 113.354167    | 40.062500    |
| <i>C. chrysosperma</i> | -1.187500     | 53.395833    | <i>C. chrysosperma</i> | 114.395833    | 38.104167    |
| <i>C. chrysosperma</i> | -1.187500     | 53.437500    | <i>C. chrysosperma</i> | 114.937500    | 34.479167    |
| <i>C. chrysosperma</i> | -1.479167     | 52.270833    | <i>C. chrysosperma</i> | 115.104167    | 34.729167    |
| <i>C. chrysosperma</i> | -100.270833   | 51.187500    | <i>C. chrysosperma</i> | 116.354167    | 37.437500    |
| <i>C. chrysosperma</i> | -100.937500   | 37.062500    | <i>C. chrysosperma</i> | 116.937500    | 30.479167    |
| <i>C. chrysosperma</i> | -101.729167   | 23.854167    | <i>C. chrysosperma</i> | 117.187500    | 31.895833    |
| <i>C. chrysosperma</i> | -103.895833   | 42.687500    | <i>C. chrysosperma</i> | 117.229167    | 36.187500    |
| <i>C. chrysosperma</i> | -104.229167   | 34.437500    | <i>C. chrysosperma</i> | 117.437500    | 36.770833    |
| <i>C. chrysosperma</i> | -104.812500   | 38.854167    | <i>C. chrysosperma</i> | 118.187500    | 30.062500    |
| <i>C. chrysosperma</i> | -104.854167   | 44.187500    | <i>C. chrysosperma</i> | 118.354167    | 31.229167    |
| <i>C. chrysosperma</i> | -104.937500   | 38.854167    | <i>C. chrysosperma</i> | 118.812500    | 32.062500    |
| <i>C. chrysosperma</i> | -105.104167   | 40.604167    | <i>C. chrysosperma</i> | 12.020833     | 54.979167    |
| <i>C. chrysosperma</i> | -105.229167   | 39.729167    | <i>C. chrysosperma</i> | 12.062500     | 54.979167    |
| <i>C. chrysosperma</i> | -105.229167   | 39.770833    | <i>C. chrysosperma</i> | 12.395833     | 55.687500    |
| <i>C. chrysosperma</i> | -105.562500   | 28.312500    | <i>C. chrysosperma</i> | 12.562500     | 52.437500    |
| <i>C. chrysosperma</i> | -105.604167   | 41.312500    | <i>C. chrysosperma</i> | 127.729167    | 43.645833    |
| <i>C. chrysosperma</i> | -108.187500   | 45.979167    | <i>C. chrysosperma</i> | 127.812500    | 43.687500    |
| <i>C. chrysosperma</i> | -108.520833   | 45.770833    | <i>C. chrysosperma</i> | 13.312500     | 47.312500    |
| <i>C. chrysosperma</i> | -108.895833   | 45.395833    | <i>C. chrysosperma</i> | 13.354167     | 65.104167    |
| <i>C. chrysosperma</i> | -109.020833   | 45.229167    | <i>C. chrysosperma</i> | 13.437500     | 52.312500    |
| <i>C. chrysosperma</i> | -110.354167   | 46.895833    | <i>C. chrysosperma</i> | 13.895833     | 65.812500    |
| <i>C. chrysosperma</i> | -111.604167   | 57.187500    | <i>C. chrysosperma</i> | 138.895833    | -35.270833   |
| <i>C. chrysosperma</i> | -111.812500   | 41.770833    | <i>C. chrysosperma</i> | 14.437500     | 46.562500    |
| <i>C. chrysosperma</i> | -112.020833   | 46.604167    | <i>C. chrysosperma</i> | 140.979167    | 43.020833    |
| <i>C. chrysosperma</i> | -112.187500   | 38.395833    | <i>C. chrysosperma</i> | 141.062500    | 39.645833    |
| <i>C. chrysosperma</i> | -112.229167   | 38.437500    | <i>C. chrysosperma</i> | 141.354167    | 43.020833    |
| <i>C. chrysosperma</i> | -112.270833   | 38.437500    | <i>C. chrysosperma</i> | 141.354167    | 43.062500    |
| <i>C. chrysosperma</i> | -112.687500   | 33.937500    | <i>C. chrysosperma</i> | 15.354167     | 66.562500    |
| <i>C. chrysosperma</i> | -112.729167   | 46.395833    | <i>C. chrysosperma</i> | 15.854167     | 65.104167    |
| <i>C. chrysosperma</i> | -116.645833   | 46.937500    | <i>C. chrysosperma</i> | 169.187500    | -45.062500   |
| <i>C. chrysosperma</i> | -116.937500   | 46.854167    | <i>C. chrysosperma</i> | 169.312500    | -45.229167   |
| <i>C. chrysosperma</i> | -117.187500   | 46.729167    | <i>C. chrysosperma</i> | 169.395833    | -45.270833   |
| <i>C. chrysosperma</i> | -117.354167   | 46.645833    | <i>C. chrysosperma</i> | 17.104167     | 68.479167    |
| <i>C. chrysosperma</i> | -118.145833   | 47.645833    | <i>C. chrysosperma</i> | 170.479167    | -44.020833   |
| <i>C. chrysosperma</i> | -118.229167   | 46.604167    | <i>C. chrysosperma</i> | 172.687500    | -43.395833   |
| <i>C. chrysosperma</i> | -118.854167   | 46.645833    | <i>C. chrysosperma</i> | 175.270833    | -40.604167   |
| <i>C. chrysosperma</i> | -119.312500   | 34.354167    | <i>C. chrysosperma</i> | 175.604167    | -40.354167   |
| <i>C. chrysosperma</i> | -119.520833   | 36.604167    | <i>C. chrysosperma</i> | 178.020833    | -38.645833   |

|                       |             |           |                       |           |            |
|-----------------------|-------------|-----------|-----------------------|-----------|------------|
| <i>C.chrysosperma</i> | -119.645833 | 36.770833 | <i>C.chrysosperma</i> | 18.354167 | 68.895833  |
| <i>C.chrysosperma</i> | -121.270833 | 38.562500 | <i>C.chrysosperma</i> | 18.729167 | 69.020833  |
| <i>C.chrysosperma</i> | -121.479167 | 45.729167 | <i>C.chrysosperma</i> | 19.645833 | 68.895833  |
| <i>C.chrysosperma</i> | -121.812500 | 37.270833 | <i>C.chrysosperma</i> | 20.104167 | 69.104167  |
| <i>C.chrysosperma</i> | -121.895833 | 37.729167 | <i>C.chrysosperma</i> | 21.104167 | 52.354167  |
| <i>C.chrysosperma</i> | -121.937500 | 37.437500 | <i>C.chrysosperma</i> | 21.270833 | 69.562500  |
| <i>C.chrysosperma</i> | -121.937500 | 37.645833 | <i>C.chrysosperma</i> | 22.895833 | 70.020833  |
| <i>C.chrysosperma</i> | -121.937500 | 37.937500 | <i>C.chrysosperma</i> | 23.979167 | 61.562500  |
| <i>C.chrysosperma</i> | -122.062500 | 37.937500 | <i>C.chrysosperma</i> | 24.937500 | 60.187500  |
| <i>C.chrysosperma</i> | -122.187500 | 47.104167 | <i>C.chrysosperma</i> | 25.145833 | 61.062500  |
| <i>C.chrysosperma</i> | -122.270833 | 37.854167 | <i>C.chrysosperma</i> | 25.687500 | 68.979167  |
| <i>C.chrysosperma</i> | -122.270833 | 37.895833 | <i>C.chrysosperma</i> | 26.062500 | -32.687500 |
| <i>C.chrysosperma</i> | -122.479167 | 48.770833 | <i>C.chrysosperma</i> | 27.104167 | 62.062500  |
| <i>C.chrysosperma</i> | -122.812500 | 45.729167 | <i>C.chrysosperma</i> | 27.937500 | -26.687500 |
| <i>C.chrysosperma</i> | -17.979167  | 65.895833 | <i>C.chrysosperma</i> | 28.312500 | -26.187500 |
| <i>C.chrysosperma</i> | -2.229167   | 37.229167 | <i>C.chrysosperma</i> | 29.687500 | -30.062500 |
| <i>C.chrysosperma</i> | -2.604167   | 36.812500 | <i>C.chrysosperma</i> | 30.270833 | -29.562500 |
| <i>C.chrysosperma</i> | -2.604167   | 42.354167 | <i>C.chrysosperma</i> | 41.437500 | 61.104167  |
| <i>C.chrysosperma</i> | -2.812500   | 42.937500 | <i>C.chrysosperma</i> | 44.520833 | 40.145833  |
| <i>C.chrysosperma</i> | -2.812500   | 52.104167 | <i>C.chrysosperma</i> | 6.104167  | 49.729167  |
| <i>C.chrysosperma</i> | -3.562500   | 38.312500 | <i>C.chrysosperma</i> | 6.229167  | 46.229167  |
| <i>C.chrysosperma</i> | -4.020833   | 56.229167 | <i>C.chrysosperma</i> | 6.895833  | 49.187500  |
| <i>C.chrysosperma</i> | -4.520833   | 42.020833 | <i>C.chrysosperma</i> | 7.187500  | 47.229167  |
| <i>C.chrysosperma</i> | -4.729167   | 42.520833 | <i>C.chrysosperma</i> | 7.479167  | 46.020833  |
| <i>C.chrysosperma</i> | -5.854167   | 56.812500 | <i>C.chrysosperma</i> | 7.645833  | 51.354167  |
| <i>C.chrysosperma</i> | -6.104167   | 36.687500 | <i>C.chrysosperma</i> | 7.812500  | 46.312500  |
| <i>C.chrysosperma</i> | -6.520833   | 40.604167 | <i>C.chrysosperma</i> | 73.354167 | 61.270833  |
| <i>C.chrysosperma</i> | -7.479167   | 41.562500 | <i>C.chrysosperma</i> | 73.437500 | 61.229167  |
| <i>C.chrysosperma</i> | -71.104167  | 42.395833 | <i>C.chrysosperma</i> | 75.104167 | 39.145833  |
| <i>C.chrysosperma</i> | -71.395833  | 46.854167 | <i>C.chrysosperma</i> | 76.020833 | 39.270833  |
| <i>C.chrysosperma</i> | -72.937500  | 41.312500 | <i>C.chrysosperma</i> | 76.062500 | 39.270833  |
| <i>C.chrysosperma</i> | -73.479167  | 45.520833 | <i>C.chrysosperma</i> | 76.104167 | 39.437500  |
| <i>C.chrysosperma</i> | -75.020833  | 39.562500 | <i>C.chrysosperma</i> | 76.145833 | 37.020833  |
| <i>C.chrysosperma</i> | -75.645833  | 45.395833 | <i>C.chrysosperma</i> | 76.145833 | 39.312500  |
| <i>C.chrysosperma</i> | -75.687500  | 45.437500 | <i>C.chrysosperma</i> | 76.145833 | 39.770833  |
| <i>C.chrysosperma</i> | -79.395833  | 43.687500 | <i>C.chrysosperma</i> | 76.187500 | 38.854167  |
| <i>C.chrysosperma</i> | -79.645833  | 43.854167 | <i>C.chrysosperma</i> | 76.270833 | 39.229167  |
| <i>C.chrysosperma</i> | -79.729167  | 44.895833 | <i>C.chrysosperma</i> | 76.520833 | 39.437500  |
| <i>C.chrysosperma</i> | -80.104167  | 43.354167 | <i>C.chrysosperma</i> | 76.604167 | 37.770833  |
| <i>C.chrysosperma</i> | -80.520833  | 43.187500 | <i>C.chrysosperma</i> | 76.604167 | 38.604167  |
| <i>C.chrysosperma</i> | -80.895833  | 35.145833 | <i>C.chrysosperma</i> | 76.895833 | 37.062500  |
| <i>C.chrysosperma</i> | -83.729167  | 42.229167 | <i>C.chrysosperma</i> | 76.895833 | 38.020833  |
| <i>C.chrysosperma</i> | -86.020833  | 49.979167 | <i>C.chrysosperma</i> | 76.895833 | 39.145833  |
| <i>C.chrysosperma</i> | -86.979167  | 46.354167 | <i>C.chrysosperma</i> | 76.979167 | 36.854167  |

|                       |            |           |                       |           |           |
|-----------------------|------------|-----------|-----------------------|-----------|-----------|
| <i>C.chrysosperma</i> | -87.812500 | 41.812500 | <i>C.chrysosperma</i> | 76.979167 | 38.145833 |
| <i>C.chrysosperma</i> | -87.854167 | 41.812500 | <i>C.chrysosperma</i> | 77.020833 | 38.395833 |
| <i>C.chrysosperma</i> | -89.395833 | 43.062500 | <i>C.chrysosperma</i> | 77.062500 | 38.229167 |
| <i>C.chrysosperma</i> | -89.520833 | 45.687500 | <i>C.chrysosperma</i> | 77.104167 | 38.229167 |
| <i>C.chrysosperma</i> | -89.645833 | 43.437500 | <i>C.chrysosperma</i> | 77.104167 | 38.395833 |
| <i>C.chrysosperma</i> | -89.979167 | 48.229167 | <i>C.chrysosperma</i> | 77.104167 | 38.479167 |
| <i>C.chrysosperma</i> | -90.354167 | 47.770833 | <i>C.chrysosperma</i> | 77.104167 | 38.645833 |
| <i>C.chrysosperma</i> | -91.770833 | 43.312500 | <i>C.chrysosperma</i> | 77.145833 | 38.270833 |
| <i>C.chrysosperma</i> | -93.104167 | 44.937500 | <i>C.chrysosperma</i> | 77.145833 | 38.479167 |
| <i>C.chrysosperma</i> | -93.395833 | 45.229167 | <i>C.chrysosperma</i> | 77.187500 | 38.020833 |
| <i>C.chrysosperma</i> | -93.604167 | 42.020833 | <i>C.chrysosperma</i> | 77.229167 | 38.187500 |
| <i>C.chrysosperma</i> | -94.479167 | 43.645833 | <i>C.chrysosperma</i> | 77.270833 | 37.854167 |
| <i>C.chrysosperma</i> | -95.562500 | 38.770833 | <i>C.chrysosperma</i> | 77.270833 | 38.104167 |
| <i>C.chrysosperma</i> | -96.562500 | 39.187500 | <i>C.chrysosperma</i> | 77.270833 | 38.270833 |
| <i>C.chrysosperma</i> | -96.687500 | 40.812500 | <i>C.chrysosperma</i> | 77.270833 | 38.312500 |
| <i>C.chrysosperma</i> | -96.729167 | 39.312500 | <i>C.chrysosperma</i> | 77.312500 | 38.062500 |
| <i>C.chrysosperma</i> | -96.812500 | 44.312500 | <i>C.chrysosperma</i> | 77.312500 | 38.187500 |
| <i>C.chrysosperma</i> | -97.229167 | 41.687500 | <i>C.chrysosperma</i> | 77.312500 | 38.229167 |
| <i>C.chrysosperma</i> | -97.354167 | 38.937500 | <i>C.chrysosperma</i> | 77.312500 | 39.687500 |
| <i>C.chrysosperma</i> | -97.687500 | 38.562500 | <i>C.chrysosperma</i> | 77.354167 | 38.062500 |
| <i>C.chrysosperma</i> | -98.562500 | 45.145833 | <i>C.chrysosperma</i> | 77.395833 | 37.729167 |
| <i>C.chrysosperma</i> | -98.770833 | 38.020833 | <i>C.chrysosperma</i> | 77.395833 | 37.937500 |
| <i>C.chrysosperma</i> | -99.270833 | 39.437500 | <i>C.chrysosperma</i> | 77.395833 | 38.770833 |
| <i>C.chrysosperma</i> | -99.312500 | 39.354167 | <i>C.chrysosperma</i> | 77.437500 | 38.604167 |
| <i>C.chrysosperma</i> | -99.312500 | 39.562500 | <i>C.chrysosperma</i> | 77.437500 | 38.645833 |
| <i>C.chrysosperma</i> | -99.937500 | 41.312500 | <i>C.chrysosperma</i> | 77.479167 | 37.854167 |
| <i>C.chrysosperma</i> | 0.937500   | 41.645833 | <i>C.chrysosperma</i> | 77.479167 | 38.937500 |
| <i>C.chrysosperma</i> | 1.479167   | 42.520833 | <i>C.chrysosperma</i> | 77.520833 | 38.020833 |
| <i>C.chrysosperma</i> | 1.479167   | 52.604167 | <i>C.chrysosperma</i> | 77.520833 | 38.145833 |
| <i>C.chrysosperma</i> | 1.520833   | 42.520833 | <i>C.chrysosperma</i> | 77.520833 | 38.479167 |
| <i>C.chrysosperma</i> | 1.645833   | 50.645833 | <i>C.chrysosperma</i> | 77.520833 | 38.895833 |
| <i>C.chrysosperma</i> | 101.812500 | 33.479167 | <i>C.chrysosperma</i> | 77.645833 | 37.979167 |
| <i>C.chrysosperma</i> | 101.937500 | 36.770833 | <i>C.chrysosperma</i> | 77.687500 | 38.770833 |
| <i>C.chrysosperma</i> | 102.145833 | 36.479167 | <i>C.chrysosperma</i> | 77.687500 | 38.895833 |
| <i>C.chrysosperma</i> | 102.520833 | 36.437500 | <i>C.chrysosperma</i> | 77.854167 | 38.979167 |
| <i>C.chrysosperma</i> | 102.729167 | 36.604167 | <i>C.chrysosperma</i> | 77.979167 | 39.104167 |
| <i>C.chrysosperma</i> | 103.145833 | 34.604167 | <i>C.chrysosperma</i> | 78.270833 | 37.604167 |
| <i>C.chrysosperma</i> | 103.187500 | 34.062500 | <i>C.chrysosperma</i> | 78.270833 | 39.520833 |
| <i>C.chrysosperma</i> | 103.354167 | 36.604167 | <i>C.chrysosperma</i> | 78.354167 | 39.604167 |
| <i>C.chrysosperma</i> | 103.479167 | 34.604167 | <i>C.chrysosperma</i> | 78.395833 | 37.687500 |
| <i>C.chrysosperma</i> | 103.604167 | 34.312500 | <i>C.chrysosperma</i> | 78.562500 | 37.395833 |
| <i>C.chrysosperma</i> | 103.645833 | 34.979167 | <i>C.chrysosperma</i> | 78.812500 | 39.812500 |
| <i>C.chrysosperma</i> | 103.687500 | 34.937500 | <i>C.chrysosperma</i> | 78.895833 | 39.645833 |
| <i>C.chrysosperma</i> | 103.729167 | 35.229167 | <i>C.chrysosperma</i> | 78.937500 | 39.729167 |

|                       |            |           |                       |           |           |
|-----------------------|------------|-----------|-----------------------|-----------|-----------|
| <i>C.chrysosperma</i> | 104.145833 | 34.687500 | <i>C.chrysosperma</i> | 79.104167 | 37.270833 |
| <i>C.chrysosperma</i> | 105.020833 | 37.479167 | <i>C.chrysosperma</i> | 79.104167 | 39.895833 |
| <i>C.chrysosperma</i> | 105.312500 | 37.520833 | <i>C.chrysosperma</i> | 79.270833 | 41.187500 |
| <i>C.chrysosperma</i> | 105.687500 | 34.479167 | <i>C.chrysosperma</i> | 79.354167 | 40.687500 |
| <i>C.chrysosperma</i> | 105.895833 | 37.854167 | <i>C.chrysosperma</i> | 79.395833 | 40.062500 |
| <i>C.chrysosperma</i> | 105.895833 | 38.104167 | <i>C.chrysosperma</i> | 79.604167 | 37.145833 |
| <i>C.chrysosperma</i> | 106.187500 | 36.187500 | <i>C.chrysosperma</i> | 79.645833 | 36.937500 |
| <i>C.chrysosperma</i> | 106.187500 | 38.229167 | <i>C.chrysosperma</i> | 79.645833 | 37.479167 |
| <i>C.chrysosperma</i> | 106.229167 | 36.020833 | <i>C.chrysosperma</i> | 79.645833 | 41.187500 |
| <i>C.chrysosperma</i> | 106.312500 | 38.854167 | <i>C.chrysosperma</i> | 79.687500 | 37.562500 |
| <i>C.chrysosperma</i> | 106.354167 | 39.062500 | <i>C.chrysosperma</i> | 79.729167 | 37.145833 |
| <i>C.chrysosperma</i> | 107.687500 | 35.729167 | <i>C.chrysosperma</i> | 79.979167 | 37.104167 |
| <i>C.chrysosperma</i> | 107.770833 | 34.270833 | <i>C.chrysosperma</i> | 8.020833  | 50.020833 |
| <i>C.chrysosperma</i> | 107.979167 | 35.770833 | <i>C.chrysosperma</i> | 8.145833  | 47.020833 |
| <i>C.chrysosperma</i> | 108.062500 | 34.270833 | <i>C.chrysosperma</i> | 8.270833  | 46.479167 |
| <i>C.chrysosperma</i> | 109.770833 | 34.562500 | <i>C.chrysosperma</i> | 8.395833  | 56.479167 |
| <i>C.chrysosperma</i> | 111.645833 | 40.729167 | <i>C.chrysosperma</i> | 8.937500  | 46.020833 |
| <i>C.chrysosperma</i> | 111.729167 | 40.812500 | <i>C.chrysosperma</i> | 80.020833 | 41.395833 |
| <i>C.chrysosperma</i> | 111.729167 | 40.854167 | <i>C.chrysosperma</i> | 80.062500 | 40.354167 |
| <i>C.chrysosperma</i> | 112.395833 | 32.937500 | <i>C.chrysosperma</i> | 80.104167 | 40.395833 |
| <i>C.chrysosperma</i> | 112.520833 | 35.104167 | <i>C.chrysosperma</i> | 80.145833 | 40.395833 |
| <i>C.chrysosperma</i> | 80.229167  | 41.354167 | <i>C.chrysosperma</i> | 80.187500 | 37.104167 |
| <i>C.chrysosperma</i> | 80.270833  | 40.937500 | <i>C.chrysosperma</i> | 80.187500 | 40.395833 |
| <i>C.chrysosperma</i> | 80.270833  | 41.062500 | <i>C.chrysosperma</i> | 80.187500 | 41.312500 |
| <i>C.chrysosperma</i> | 80.312500  | 40.812500 | <i>C.chrysosperma</i> | 80.229167 | 41.312500 |
| <i>C.chrysosperma</i> | 80.354167  | 37.645833 | <i>C.chrysosperma</i> | 89.979167 | 36.812500 |
| <i>C.chrysosperma</i> | 80.354167  | 40.645833 | <i>C.chrysosperma</i> | 9.312500  | 47.020833 |
| <i>C.chrysosperma</i> | 80.354167  | 41.104167 | <i>C.chrysosperma</i> | 9.604167  | 62.312500 |
| <i>C.chrysosperma</i> | 80.354167  | 41.270833 | <i>C.chrysosperma</i> | 92.854167 | 43.062500 |
| <i>C.chrysosperma</i> | 80.479167  | 40.645833 | <i>C.chrysosperma</i> | 92.895833 | 43.062500 |
| <i>C.chrysosperma</i> | 80.562500  | 40.770833 | <i>C.chrysosperma</i> | 92.937500 | 43.062500 |
| <i>C.chrysosperma</i> | 80.562500  | 41.312500 | <i>C.chrysosperma</i> | 93.229167 | 42.895833 |
| <i>C.chrysosperma</i> | 80.604167  | 41.354167 | <i>C.chrysosperma</i> | 93.437500 | 42.895833 |
| <i>C.chrysosperma</i> | 80.645833  | 40.604167 | <i>C.chrysosperma</i> | 93.479167 | 42.854167 |
| <i>C.chrysosperma</i> | 80.770833  | 36.187500 | <i>C.chrysosperma</i> | 93.520833 | 42.812500 |
| <i>C.chrysosperma</i> | 80.770833  | 40.520833 | <i>C.chrysosperma</i> | 93.604167 | 42.729167 |
| <i>C.chrysosperma</i> | 80.812500  | 36.979167 | <i>C.chrysosperma</i> | 93.729167 | 42.770833 |
| <i>C.chrysosperma</i> | 80.812500  | 41.354167 | <i>C.chrysosperma</i> | 93.770833 | 42.812500 |
| <i>C.chrysosperma</i> | 80.854167  | 40.437500 | <i>C.chrysosperma</i> | 93.895833 | 42.895833 |
| <i>C.chrysosperma</i> | 80.854167  | 41.354167 | <i>C.chrysosperma</i> | 93.937500 | 42.645833 |
| <i>C.chrysosperma</i> | 80.937500  | 40.437500 | <i>C.chrysosperma</i> | 93.937500 | 42.687500 |
| <i>C.chrysosperma</i> | 80.937500  | 40.520833 | <i>C.chrysosperma</i> | 93.979167 | 42.687500 |
| <i>C.chrysosperma</i> | 81.062500  | 36.979167 | <i>C.chrysosperma</i> | 84.895833 | 45.562500 |
| <i>C.chrysosperma</i> | 81.270833  | 40.562500 | <i>C.chrysosperma</i> | 85.604167 | 44.312500 |

|                       |             |           |                       |           |           |
|-----------------------|-------------|-----------|-----------------------|-----------|-----------|
| <i>C.chrysosperma</i> | 81.354167   | 36.937500 | <i>C.chrysosperma</i> | 86.020833 | 41.812500 |
| <i>C.chrysosperma</i> | 81.520833   | 36.854167 | <i>C.chrysosperma</i> | 86.104167 | 40.854167 |
| <i>C.chrysosperma</i> | 81.562500   | 36.854167 | <i>C.chrysosperma</i> | 86.479167 | 40.312500 |
| <i>C.chrysosperma</i> | 81.729167   | 41.729167 | <i>C.chrysosperma</i> | 86.520833 | 41.937500 |
| <i>C.chrysosperma</i> | 81.854167   | 36.312500 | <i>C.chrysosperma</i> | 87.145833 | 40.770833 |
| <i>C.chrysosperma</i> | 82.270833   | 41.729167 | <i>C.chrysosperma</i> | 87.479167 | 43.979167 |
| <i>C.chrysosperma</i> | 82.645833   | 43.770833 | <i>C.chrysosperma</i> | 87.520833 | 43.979167 |
| <i>C.chrysosperma</i> | 82.687500   | 37.020833 | <i>C.chrysosperma</i> | 87.562500 | 43.729167 |
| <i>C.chrysosperma</i> | 82.687500   | 37.062500 | <i>C.chrysosperma</i> | 87.562500 | 44.187500 |
| <i>C.chrysosperma</i> | 82.687500   | 41.187500 | <i>C.chrysosperma</i> | 88.645833 | 42.770833 |
| <i>C.chrysosperma</i> | 82.812500   | 41.104167 | <i>C.chrysosperma</i> | 88.645833 | 42.812500 |
| <i>C.chrysosperma</i> | 82.812500   | 41.604167 | <i>C.chrysosperma</i> | 88.937500 | 39.270833 |
| <i>C.chrysosperma</i> | 82.979167   | 46.770833 | <i>C.chrysosperma</i> | 83.354167 | 46.729167 |
| <i>C.chrysosperma</i> | 83.062500   | 41.937500 | <i>C.chrysosperma</i> | 84.687500 | 44.437500 |
| <i>C.chrysosperma</i> | 83.145833   | 41.312500 | <i>C.chrysosperma</i> | 84.729167 | 44.687500 |
| <i>C.nivea</i>        | -104.395833 | 44.645833 | <i>C.nivea</i>        | 22.895833 | 62.020833 |
| <i>C.nivea</i>        | -104.729167 | 39.354167 | <i>C.nivea</i>        | 23.687500 | 60.520833 |
| <i>C.nivea</i>        | -105.520833 | 38.104167 | <i>C.nivea</i>        | 23.729167 | 61.437500 |
| <i>C.nivea</i>        | -106.145833 | 38.479167 | <i>C.nivea</i>        | 23.770833 | 61.437500 |
| <i>C.nivea</i>        | -106.312500 | 38.479167 | <i>C.nivea</i>        | 23.812500 | 61.479167 |
| <i>C.nivea</i>        | -111.270833 | 44.479167 | <i>C.nivea</i>        | 24.062500 | 61.229167 |
| <i>C.nivea</i>        | -112.104167 | 46.229167 | <i>C.nivea</i>        | 24.937500 | 60.187500 |
| <i>C.nivea</i>        | -122.187500 | 48.062500 | <i>C.nivea</i>        | 25.062500 | 60.229167 |
| <i>C.nivea</i>        | -71.187500  | 42.395833 | <i>C.nivea</i>        | 25.645833 | 68.895833 |
| <i>C.nivea</i>        | -72.687500  | 44.645833 | <i>C.nivea</i>        | 25.687500 | 68.979167 |
| <i>C.nivea</i>        | -75.645833  | 39.729167 | <i>C.nivea</i>        | 25.687500 | 69.229167 |
| <i>C.nivea</i>        | -76.312500  | 42.562500 | <i>C.nivea</i>        | 25.979167 | 64.812500 |
| <i>C.nivea</i>        | -77.270833  | 42.854167 | <i>C.nivea</i>        | 26.062500 | 61.937500 |
| <i>C.nivea</i>        | -77.937500  | 43.062500 | <i>C.nivea</i>        | 26.145833 | 62.270833 |
| <i>C.nivea</i>        | -84.270833  | 39.270833 | <i>C.nivea</i>        | 26.187500 | 64.770833 |
| <i>C.nivea</i>        | -84.395833  | 40.229167 | <i>C.nivea</i>        | 27.104167 | 60.729167 |
| <i>C.nivea</i>        | -84.479167  | 42.729167 | <i>C.nivea</i>        | 27.145833 | 65.520833 |
| <i>C.nivea</i>        | -86.979167  | 46.354167 | <i>C.nivea</i>        | 29.854167 | 63.104167 |
| <i>C.nivea</i>        | -88.812500  | 47.979167 | <i>C.nivea</i>        | 3.479167  | 50.520833 |
| <i>C.nivea</i>        | -92.354167  | 47.895833 | <i>C.nivea</i>        | 31.270833 | 49.229167 |
| <i>C.nivea</i>        | -92.437500  | 46.645833 | <i>C.nivea</i>        | 4.312500  | 52.104167 |
| <i>C.nivea</i>        | -92.979167  | 45.312500 | <i>C.nivea</i>        | 4.354167  | 52.145833 |
| <i>C.nivea</i>        | -93.187500  | 44.979167 | <i>C.nivea</i>        | 4.562500  | 52.354167 |
| <i>C.nivea</i>        | -93.395833  | 44.937500 | <i>C.nivea</i>        | 4.645833  | 52.312500 |
| <i>C.nivea</i>        | -93.395833  | 45.229167 | <i>C.nivea</i>        | 4.645833  | 52.604167 |
| <i>C.nivea</i>        | -95.229167  | 47.270833 | <i>C.nivea</i>        | 4.645833  | 52.645833 |
| <i>C.nivea</i>        | -96.687500  | 40.812500 | <i>C.nivea</i>        | 4.687500  | 52.645833 |
| <i>C.nivea</i>        | -98.354167  | 42.270833 | <i>C.nivea</i>        | 4.729167  | 52.645833 |
| <i>C.nivea</i>        | -99.270833  | 39.437500 | <i>C.nivea</i>        | 5.395833  | 51.979167 |

|                |            |           |                |           |           |
|----------------|------------|-----------|----------------|-----------|-----------|
| <i>C.nivea</i> | -99.312500 | 39.562500 | <i>C.nivea</i> | 6.062500  | 49.687500 |
| <i>C.nivea</i> | 1.604167   | 50.437500 | <i>C.nivea</i> | 6.062500  | 49.812500 |
| <i>C.nivea</i> | 10.062500  | 60.104167 | <i>C.nivea</i> | 6.062500  | 49.979167 |
| <i>C.nivea</i> | 10.104167  | 56.187500 | <i>C.nivea</i> | 6.145833  | 49.729167 |
| <i>C.nivea</i> | 10.145833  | 61.520833 | <i>C.nivea</i> | 6.187500  | 49.729167 |
| <i>C.nivea</i> | 10.187500  | 59.270833 | <i>C.nivea</i> | 6.437500  | 52.354167 |
| <i>C.nivea</i> | 10.187500  | 60.145833 | <i>C.nivea</i> | 6.645833  | 52.312500 |
| <i>C.nivea</i> | 10.270833  | 59.437500 | <i>C.nivea</i> | 7.937500  | 58.604167 |
| <i>C.nivea</i> | 10.312500  | 59.187500 | <i>C.nivea</i> | 7.979167  | 50.979167 |
| <i>C.nivea</i> | 10.312500  | 60.187500 | <i>C.nivea</i> | 7.979167  | 51.020833 |
| <i>C.nivea</i> | 10.354167  | 59.354167 | <i>C.nivea</i> | 76.187500 | 38.854167 |
| <i>C.nivea</i> | 10.395833  | 59.104167 | <i>C.nivea</i> | 76.270833 | 39.145833 |
| <i>C.nivea</i> | 10.395833  | 59.312500 | <i>C.nivea</i> | 76.604167 | 37.770833 |
| <i>C.nivea</i> | 10.395833  | 59.354167 | <i>C.nivea</i> | 76.895833 | 39.145833 |
| <i>C.nivea</i> | 10.395833  | 59.854167 | <i>C.nivea</i> | 77.270833 | 38.312500 |
| <i>C.nivea</i> | 10.437500  | 51.104167 | <i>C.nivea</i> | 77.312500 | 38.187500 |
| <i>C.nivea</i> | 10.437500  | 59.312500 | <i>C.nivea</i> | 77.979167 | 39.104167 |
| <i>C.nivea</i> | 10.479167  | 59.854167 | <i>C.nivea</i> | 78.395833 | 37.687500 |
| <i>C.nivea</i> | 10.645833  | 59.979167 | <i>C.nivea</i> | 79.104167 | 37.270833 |
| <i>C.nivea</i> | 10.770833  | 59.270833 | <i>C.nivea</i> | 79.604167 | 37.145833 |
| <i>C.nivea</i> | 10.770833  | 59.479167 | <i>C.nivea</i> | 79.687500 | 37.562500 |
| <i>C.nivea</i> | 10.770833  | 59.687500 | <i>C.nivea</i> | 79.729167 | 37.145833 |
| <i>C.nivea</i> | 10.937500  | 60.687500 | <i>C.nivea</i> | 8.020833  | 50.020833 |
| <i>C.nivea</i> | 103.145833 | 34.604167 | <i>C.nivea</i> | 8.020833  | 50.854167 |
| <i>C.nivea</i> | 103.729167 | 35.229167 | <i>C.nivea</i> | 8.104167  | 50.854167 |
| <i>C.nivea</i> | 106.187500 | 36.187500 | <i>C.nivea</i> | 8.145833  | 50.854167 |
| <i>C.nivea</i> | 106.187500 | 38.229167 | <i>C.nivea</i> | 8.270833  | 46.937500 |
| <i>C.nivea</i> | 109.687500 | 38.312500 | <i>C.nivea</i> | 8.270833  | 50.145833 |
| <i>C.nivea</i> | 11.020833  | 60.812500 | <i>C.nivea</i> | 8.479167  | 59.395833 |
| <i>C.nivea</i> | 11.187500  | 60.729167 | <i>C.nivea</i> | 8.687500  | 58.479167 |
| <i>C.nivea</i> | 11.645833  | 63.979167 | <i>C.nivea</i> | 80.187500 | 37.104167 |
| <i>C.nivea</i> | 11.729167  | 59.229167 | <i>C.nivea</i> | 80.645833 | 40.604167 |
| <i>C.nivea</i> | 11.937500  | 58.229167 | <i>C.nivea</i> | 80.770833 | 36.187500 |
| <i>C.nivea</i> | 13.562500  | 52.812500 | <i>C.nivea</i> | 81.145833 | 43.854167 |
| <i>C.nivea</i> | 13.604167  | 52.812500 | <i>C.nivea</i> | 81.354167 | 36.937500 |
| <i>C.nivea</i> | 13.854167  | 58.395833 | <i>C.nivea</i> | 81.562500 | 36.854167 |
| <i>C.nivea</i> | 14.062500  | 50.895833 | <i>C.nivea</i> | 82.812500 | 41.604167 |
| <i>C.nivea</i> | 14.062500  | 50.937500 | <i>C.nivea</i> | 82.979167 | 46.770833 |
| <i>C.nivea</i> | 14.145833  | 65.687500 | <i>C.nivea</i> | 83.312500 | 46.770833 |
| <i>C.nivea</i> | 14.437500  | 63.145833 | <i>C.nivea</i> | 86.020833 | 41.812500 |
| <i>C.nivea</i> | 14.812500  | 48.562500 | <i>C.nivea</i> | 87.145833 | 40.770833 |
| <i>C.nivea</i> | 14.979167  | 62.062500 | <i>C.nivea</i> | 89.979167 | 36.812500 |
| <i>C.nivea</i> | 15.270833  | 66.520833 | <i>C.nivea</i> | 9.020833  | 60.562500 |
| <i>C.nivea</i> | 15.645833  | 66.895833 | <i>C.nivea</i> | 9.020833  | 60.854167 |

|                |            |           |                |            |           |
|----------------|------------|-----------|----------------|------------|-----------|
| <i>C.nivea</i> | 16.312500  | 64.229167 | <i>C.nivea</i> | 9.562500   | 49.979167 |
| <i>C.nivea</i> | 17.145833  | 68.479167 | <i>C.nivea</i> | 9.562500   | 59.229167 |
| <i>C.nivea</i> | 17.604167  | 59.854167 | <i>C.nivea</i> | 9.687500   | 59.020833 |
| <i>C.nivea</i> | 18.187500  | 69.104167 | <i>C.nivea</i> | 93.812500  | 43.270833 |
| <i>C.nivea</i> | 18.312500  | 59.937500 | <i>C.nivea</i> | 20.270833  | 63.812500 |
| <i>C.nivea</i> | 19.687500  | 64.104167 | <i>C.nivea</i> | 21.104167  | 69.812500 |
| <i>C.nivea</i> | 19.979167  | 47.812500 | <i>C.nivea</i> | 21.312500  | 69.645833 |
| <i>C.nivea</i> | 20.020833  | 63.895833 | <i>C.nivea</i> | 21.479167  | 65.854167 |
| <i>C.nivea</i> | 20.187500  | 63.812500 | <i>C.nivea</i> | 22.020833  | 69.854167 |
| <i>C.nivea</i> | 20.229167  | 63.812500 | <i>C.nivea</i> | 22.770833  | 62.812500 |
| <i>C.mali</i>  | 101.437500 | 36.062500 | <i>C.mali</i>  | 117.020833 | 39.770833 |
| <i>C.mali</i>  | 101.729167 | 36.604167 | <i>C.mali</i>  | 117.229167 | 31.895833 |
| <i>C.mali</i>  | 101.729167 | 36.645833 | <i>C.mali</i>  | 118.479167 | 31.687500 |
| <i>C.mali</i>  | 101.854167 | 36.562500 | <i>C.mali</i>  | 118.687500 | 39.729167 |
| <i>C.mali</i>  | 102.020833 | 35.937500 | <i>C.mali</i>  | 119.854167 | 40.145833 |
| <i>C.mali</i>  | 102.312500 | 36.479167 | <i>C.mali</i>  | 119.937500 | 36.854167 |
| <i>C.mali</i>  | 102.354167 | 35.895833 | <i>C.mali</i>  | 119.937500 | 40.104167 |
| <i>C.mali</i>  | 102.479167 | 35.854167 | <i>C.mali</i>  | 120.312500 | 40.312500 |
| <i>C.mali</i>  | 102.562500 | 36.437500 | <i>C.mali</i>  | 120.395833 | 37.354167 |
| <i>C.mali</i>  | 102.729167 | 36.645833 | <i>C.mali</i>  | 120.437500 | 40.479167 |
| <i>C.mali</i>  | 102.812500 | 36.354167 | <i>C.mali</i>  | 120.479167 | 37.645833 |
| <i>C.mali</i>  | 102.937500 | 36.270833 | <i>C.mali</i>  | 120.562500 | 37.104167 |
| <i>C.mali</i>  | 103.604167 | 27.354167 | <i>C.mali</i>  | 120.687500 | 37.187500 |
| <i>C.mali</i>  | 103.645833 | 27.354167 | <i>C.mali</i>  | 120.729167 | 36.979167 |
| <i>C.mali</i>  | 103.645833 | 27.437500 | <i>C.mali</i>  | 120.729167 | 40.604167 |
| <i>C.mali</i>  | 103.729167 | 33.937500 | <i>C.mali</i>  | 120.770833 | 37.187500 |
| <i>C.mali</i>  | 105.187500 | 34.604167 | <i>C.mali</i>  | 120.812500 | 40.729167 |
| <i>C.mali</i>  | 105.229167 | 34.854167 | <i>C.mali</i>  | 120.854167 | 37.312500 |
| <i>C.mali</i>  | 105.312500 | 34.187500 | <i>C.mali</i>  | 120.937500 | 40.854167 |
| <i>C.mali</i>  | 105.354167 | 34.770833 | <i>C.mali</i>  | 120.979167 | 37.062500 |
| <i>C.mali</i>  | 105.395833 | 34.229167 | <i>C.mali</i>  | 121.312500 | 38.895833 |
| <i>C.mali</i>  | 105.479167 | 34.270833 | <i>C.mali</i>  | 121.812500 | 39.270833 |
| <i>C.mali</i>  | 105.520833 | 34.562500 | <i>C.mali</i>  | 121.979167 | 39.395833 |
| <i>C.mali</i>  | 105.562500 | 34.562500 | <i>C.mali</i>  | 122.062500 | 39.770833 |
| <i>C.mali</i>  | 105.645833 | 34.604167 | <i>C.mali</i>  | 122.104167 | 37.520833 |
| <i>C.mali</i>  | 105.729167 | 34.479167 | <i>C.mali</i>  | 122.145833 | 39.937500 |
| <i>C.mali</i>  | 105.729167 | 35.104167 | <i>C.mali</i>  | 132.020833 | 46.437500 |
| <i>C.mali</i>  | 105.729167 | 35.229167 | <i>C.mali</i>  | 140.979167 | 43.020833 |
| <i>C.mali</i>  | 105.729167 | 35.270833 | <i>C.mali</i>  | 141.062500 | 39.645833 |
| <i>C.mali</i>  | 105.729167 | 35.479167 | <i>C.mali</i>  | 141.354167 | 43.062500 |
| <i>C.mali</i>  | 105.770833 | 34.520833 | <i>C.mali</i>  | 141.687500 | 43.145833 |
| <i>C.mali</i>  | 105.770833 | 35.187500 | <i>C.mali</i>  | 75.854167  | 39.354167 |
| <i>C.mali</i>  | 105.770833 | 35.312500 | <i>C.mali</i>  | 77.145833  | 38.354167 |
| <i>C.mali</i>  | 105.812500 | 34.687500 | <i>C.mali</i>  | 79.937500  | 37.104167 |

|               |            |           |               |            |           |
|---------------|------------|-----------|---------------|------------|-----------|
| <i>C.mali</i> | 105.854167 | 34.562500 | <i>C.mali</i> | 80.270833  | 41.145833 |
| <i>C.mali</i> | 105.854167 | 35.062500 | <i>C.mali</i> | 80.270833  | 41.229167 |
| <i>C.mali</i> | 105.854167 | 37.645833 | <i>C.mali</i> | 80.312500  | 41.312500 |
| <i>C.mali</i> | 105.895833 | 34.479167 | <i>C.mali</i> | 81.854167  | 43.729167 |
| <i>C.mali</i> | 105.895833 | 34.520833 | <i>C.mali</i> | 81.895833  | 41.812500 |
| <i>C.mali</i> | 105.895833 | 34.645833 | <i>C.mali</i> | 82.979167  | 46.770833 |
| <i>C.mali</i> | 105.895833 | 35.104167 | <i>C.mali</i> | 87.604167  | 43.812500 |
| <i>C.mali</i> | 105.895833 | 37.854167 | <i>C.mali</i> | 88.145833  | 47.854167 |
| <i>C.mali</i> | 105.979167 | 34.437500 | <i>C.mali</i> | 89.229167  | 42.979167 |
| <i>C.mali</i> | 105.979167 | 34.645833 | <i>C.mali</i> | 93.520833  | 42.812500 |
| <i>C.mali</i> | 106.062500 | 38.479167 | <i>C.mali</i> | 109.312500 | 34.479167 |
| <i>C.mali</i> | 106.104167 | 35.187500 | <i>C.mali</i> | 109.437500 | 35.770833 |
| <i>C.mali</i> | 106.312500 | 40.187500 | <i>C.mali</i> | 109.562500 | 35.854167 |
| <i>C.mali</i> | 106.437500 | 34.937500 | <i>C.mali</i> | 109.604167 | 35.604167 |
| <i>C.mali</i> | 106.895833 | 35.479167 | <i>C.mali</i> | 109.604167 | 35.687500 |
| <i>C.mali</i> | 106.937500 | 35.562500 | <i>C.mali</i> | 109.645833 | 35.520833 |
| <i>C.mali</i> | 107.062500 | 35.395833 | <i>C.mali</i> | 110.187500 | 36.062500 |
| <i>C.mali</i> | 107.229167 | 35.479167 | <i>C.mali</i> | 110.604167 | 35.229167 |
| <i>C.mali</i> | 107.270833 | 36.687500 | <i>C.mali</i> | 110.645833 | 35.354167 |
| <i>C.mali</i> | 107.354167 | 35.604167 | <i>C.mali</i> | 110.687500 | 34.645833 |
| <i>C.mali</i> | 107.479167 | 35.562500 | <i>C.mali</i> | 110.729167 | 35.229167 |
| <i>C.mali</i> | 107.604167 | 35.312500 | <i>C.mali</i> | 110.854167 | 34.520833 |
| <i>C.mali</i> | 107.604167 | 35.687500 | <i>C.mali</i> | 110.895833 | 34.520833 |
| <i>C.mali</i> | 107.687500 | 35.729167 | <i>C.mali</i> | 110.937500 | 34.437500 |
| <i>C.mali</i> | 107.770833 | 35.729167 | <i>C.mali</i> | 110.937500 | 34.520833 |
| <i>C.mali</i> | 107.770833 | 35.895833 | <i>C.mali</i> | 110.937500 | 34.770833 |
| <i>C.mali</i> | 107.812500 | 35.187500 | <i>C.mali</i> | 111.062500 | 34.062500 |
| <i>C.mali</i> | 107.812500 | 35.770833 | <i>C.mali</i> | 111.104167 | 34.395833 |
| <i>C.mali</i> | 107.812500 | 35.812500 | <i>C.mali</i> | 111.104167 | 34.729167 |
| <i>C.mali</i> | 107.854167 | 35.395833 | <i>C.mali</i> | 111.187500 | 34.770833 |
| <i>C.mali</i> | 107.854167 | 35.645833 | <i>C.mali</i> | 111.187500 | 34.979167 |
| <i>C.mali</i> | 107.895833 | 35.604167 | <i>C.mali</i> | 111.229167 | 34.312500 |
| <i>C.mali</i> | 107.979167 | 35.645833 | <i>C.mali</i> | 111.229167 | 34.895833 |
| <i>C.mali</i> | 108.062500 | 34.270833 | <i>C.mali</i> | 111.645833 | 34.395833 |
| <i>C.mali</i> | 108.145833 | 34.687500 | <i>C.mali</i> | 112.312500 | 32.937500 |
| <i>C.mali</i> | 108.187500 | 34.104167 | <i>C.mali</i> | 112.520833 | 37.895833 |
| <i>C.mali</i> | 108.187500 | 34.354167 | <i>C.mali</i> | 112.729167 | 34.937500 |
| <i>C.mali</i> | 108.229167 | 35.770833 | <i>C.mali</i> | 114.562500 | 34.479167 |
| <i>C.mali</i> | 108.354167 | 34.520833 | <i>C.mali</i> | 114.562500 | 37.062500 |
| <i>C.mali</i> | 108.437500 | 34.645833 | <i>C.mali</i> | 114.562500 | 38.437500 |
| <i>C.mali</i> | 108.604167 | 34.437500 | <i>C.mali</i> | 114.770833 | 35.645833 |
| <i>C.mali</i> | 109.062500 | 35.604167 | <i>C.mali</i> | 115.104167 | 31.770833 |
| <i>C.mali</i> | 109.270833 | 35.562500 | <i>C.mali</i> | 115.104167 | 40.604167 |
| <i>C.mali</i> | 115.520833 | 40.437500 | <i>C.mali</i> | 115.145833 | 38.854167 |



|               |            |           |               |            |           |
|---------------|------------|-----------|---------------|------------|-----------|
| <i>C.mali</i> | 115.812500 | 38.437500 | <i>C.mali</i> | 115.187500 | 34.645833 |
| <i>C.mali</i> | 116.270833 | 37.687500 | <i>C.mali</i> | 115.229167 | 37.937500 |
| <i>C.mali</i> | 116.770833 | 40.020833 | <i>C.mali</i> | 115.229167 | 40.354167 |
| <i>C.mali</i> | 116.937500 | 30.479167 | <i>C.mali</i> | 115.520833 | 38.770833 |
