# Supplementary material for: Comparative Assessment of Habitat Suitability and Niche Overlap of Three Cytospora Species in China
Source: MDPI journal article supplement (doi:10.3390/jof10010038), 2024-01-03
Supplement: s1 [file s1]

**Table S6. Dynamics of changes in distribution area of *C. mali* under different climate scenarios**

| Climate scenarios |        | Not suitable area/% | Low suitable area/% | Moderately suitable area/% | Highly suitable area/% | Total suitable area/% |
|-------------------|--------|---------------------|---------------------|----------------------------|------------------------|-----------------------|
| Current climate   |        | 66.21               | 25.49               | 5.32                       | 2.98                   | 33.79                 |
| 2021-2040         | SSP126 | 58.94               | 30.38               | 5.79                       | 4.88                   | 41.05                 |
|                   | SSP370 | 59.34               | 29.83               | 6.72                       | 4.11                   | 40.66                 |
|                   | SSP585 | 59.81               | 28.66               | 6.47                       | 5.06                   | 40.19                 |
| 2041–2060         | SSP126 | 60.38               | 27.99               | 8.17                       | 3.45                   | 39.61                 |
|                   | SSP370 | 56.99               | 30.89               | 7.56                       | 4.56                   | 43.01                 |
|                   | SSP585 | 54.5                | 31.78               | 8.28                       | 5.45                   | 45.51                 |
| 2061–2080         | SSP126 | 61.29               | 27.92               | 6.06                       | 4.73                   | 38.71                 |
|                   | SSP370 | 53.33               | 30.94               | 10.47                      | 5.26                   | 46.67                 |
|                   | SSP585 | 51.28               | 34.06               | 9.37                       | 5.29                   | 48.72                 |
| 2081–2100         | SSP126 | 60.03               | 29.14               | 5.82                       | 5.01                   | 39.97                 |
|                   | SSP370 | 45.64               | 37.14               | 11.23                      | 5.98                   | 54.35                 |
|                   | SSP585 | 46.98               | 35.77               | 11.09                      | 6.16                   | 53.02                 |
| Mean              |        | 56.52               | 30.77               | 7.87                       | 4.84                   | 25.00                 |
