# Supplementary material for: Comparative Assessment of Habitat Suitability and Niche Overlap of Three Cytospora Species in China
Source: MDPI journal article supplement (doi:10.3390/jof10010038), 2024-01-03
Supplement: s1 [file s1]

**Table S3. List of selected environmental variables for each species**

| Type          | Code                                                                                                                                | Description                                               | Unit   | Percentage Contribution |                |                 |
|---------------|-------------------------------------------------------------------------------------------------------------------------------------|-----------------------------------------------------------|--------|-------------------------|----------------|-----------------|
|               |                                                                                                                                     |                                                           |        | <i>C. chrysosperma</i>  | <i>C. mali</i> | <i>C. nivea</i> |
| Climate       | bio1                                                                                                                                | Annual mean temperature                                   | °C     | 64.4                    |                |                 |
|               | bio2                                                                                                                                | Mean diurnal range (Mean of monthly (max.temp.-min.temp.) | °C     | 7.9                     | 4.5            | 7.2             |
|               | bio4                                                                                                                                | Temperature seasonality (standard deviation*100)          |        |                         | 9.5            |                 |
|               | bio9                                                                                                                                | Mean temperature of the driest quarter                    | °C     |                         | 35.4           |                 |
|               | bio11                                                                                                                               | Mean temperature of the coldest quarter                   | °C     |                         |                | 67.7            |
|               | bio13                                                                                                                               | Precipitation of the wettest month                        | mm     | 1.3                     |                | 9.2             |
|               | bio14                                                                                                                               | Precipitation of the driest month                         | mm     |                         |                | 3.4             |
|               | bio15                                                                                                                               | Precipitation seasonality (Coefficient of variation)      |        | 7.9                     | 5.5            |                 |
|               | bio17                                                                                                                               | Precipitation of the driest quarter                       | mm     | 2.3                     |                |                 |
|               | bio18                                                                                                                               | Precipitation of the warmest quarter                      | mm     |                         | 11.3           |                 |
|               | bio19                                                                                                                               | Precipitation of coldest quarter                          | mm     | 0.2                     | 18.8           | 1.2             |
|               | t-ph                                                                                                                                | Topsoil pH (H <sub>2</sub> O)                             |        |                         | 0.2            |                 |
| Soil          | t-teb                                                                                                                               | Topsoil TEB                                               | cmol/k |                         |                | 5.4             |
|               | t-esp                                                                                                                               | Topsoil Sodicity (ESP-exchangeable sodium percentage)     | %      |                         |                | 0.6             |
|               | t-gravel                                                                                                                            | Topsoil gravel content                                    | %      | 7.6                     | 3.8            |                 |
|               | t-texture                                                                                                                           | Topsoil soil texture                                      |        |                         |                | 0.2             |
| Land cover    | Land Cover Types (Cropland, Forest, Grassland,Shrubland, Wetland, Water, Tundra, Impervious Surface, Bare Land, Snow/Ice-Disturbed) |                                                           |        | 8.6                     | 11             | 2.8             |
|               | gm-lc-v3                                                                                                                            |                                                           |        |                         |                |                 |
| Topographical | elev                                                                                                                                | Elevation                                                 | m      |                         |                | 0.9             |
|               | slope                                                                                                                               |                                                           | °      |                         |                | 1.4             |
