# Supplementary material for: Comparative Assessment of Habitat Suitability and Niche Overlap of Three Cytospora Species in China
Source: MDPI journal article supplement (doi:10.3390/jof10010038), 2024-01-03
Supplement: s1 [file s1]

**Table S4. Key climatic factors influencing habitat distribution of three species**

| <b>Species</b>        | <b>Environmental variables</b> | <b>Suitable range</b> | <b>Optimum</b> | <b>Maximum probability of existence</b> |
|-----------------------|--------------------------------|-----------------------|----------------|-----------------------------------------|
| <i>C.chrysosperma</i> | Bio1(°C)                       | 2.76–17.19            | 9.94           | 0.63                                    |
|                       | gm_lc_v3                       | >3.18                 | 21.9           | 0.62                                    |
|                       | Bio2(°C)                       | >1.9                  | 21.84          | 0.71                                    |
|                       | Bio15 (mm)                     | 0–120.14              | 49.37          | 0.54                                    |
|                       | Bio9(°C)                       | -10.46–9.17           | -0.92          | 0.62                                    |
| <i>C.mali</i>         | Bio19 (mm)                     | 0–46.55               | 16.62          | 0.68                                    |
|                       | Bio18(mm)                      | 8.57–927.25           | 272.72         | 0.7                                     |
|                       | gm_lc_v3                       | 7.08–19.23            | 18.48          | 0.96                                    |
| <i>C.nivea</i>        | Bio11(°C)                      | -13.64–4.75           | -2.09          | 0.64                                    |
|                       | Bio13(mm)                      | 0–154.09              | 7.52           | 0.66                                    |
|                       | t teb                          | 0–46.58               | 4.25           | 0.65                                    |
