# Supplementary material for: Comparative Assessment of Habitat Suitability and Niche Overlap of Three Cytospora Species in China
Source: MDPI journal article supplement (doi:10.3390/jof10010038), 2024-01-03
Supplement: s1 [file s1]

**Table S8. Percentage of distribution changes of *C. chrysosperma* between current and future climate-change scenarios**

| Scenario | Period  | Extended area ( $\times 10^4/\text{km}^2$ ) | Shrink area ( $\times 10^4/\text{km}^2$ ) | Stable area ( $\times 10^4/\text{km}^2$ ) |
|----------|---------|---------------------------------------------|-------------------------------------------|-------------------------------------------|
|          | Current |                                             |                                           |                                           |
| SSP126   | 2030S   | 32.129                                      | 12.553                                    | 185.448                                   |
|          | 2050S   | 35.598                                      | 24.168                                    | 173.832                                   |
|          | 2070S   | 19.326                                      | 30.789                                    | 167.211                                   |
|          | 2090S   | 18.761                                      | 23.302                                    | 174.699                                   |
| SSP370   | 2030S   | 20.018                                      | 21.857                                    | 176.143                                   |
|          | 2050S   | 38.092                                      | 22.668                                    | 175.332                                   |
|          | 2070S   | 64.109                                      | 36.904                                    | 161.097                                   |
|          | 2090S   | 56.929                                      | 73.397                                    | 124.604                                   |
| SSP585   | 2030S   | 41.112                                      | 9.391                                     | 188.609                                   |
|          | 2050S   | 44.675                                      | 25.209                                    | 172.791                                   |
|          | 2070S   | 47.855                                      | 50.257                                    | 147.743                                   |
|          | 2090S   | 57.104                                      | 76.559                                    | 121.442                                   |
