# Supplementary figures and images for: Comparative Assessment of Habitat Suitability and Niche Overlap of Three Cytospora Species in China
Source: MDPI journal article supplement (doi:10.3390/jof10010038), 2024-01-03

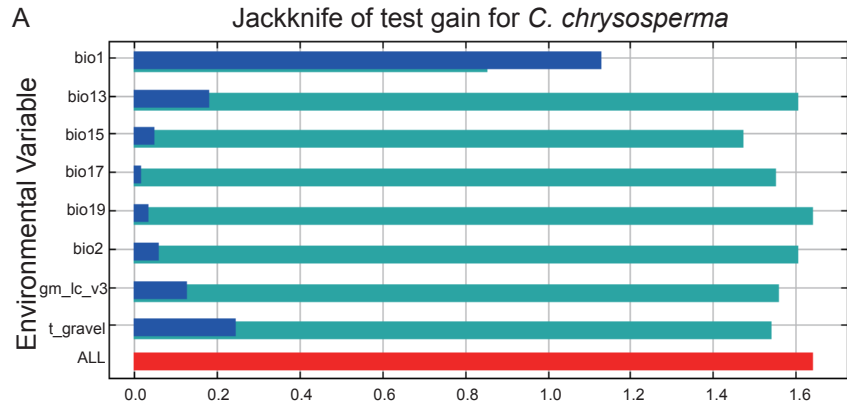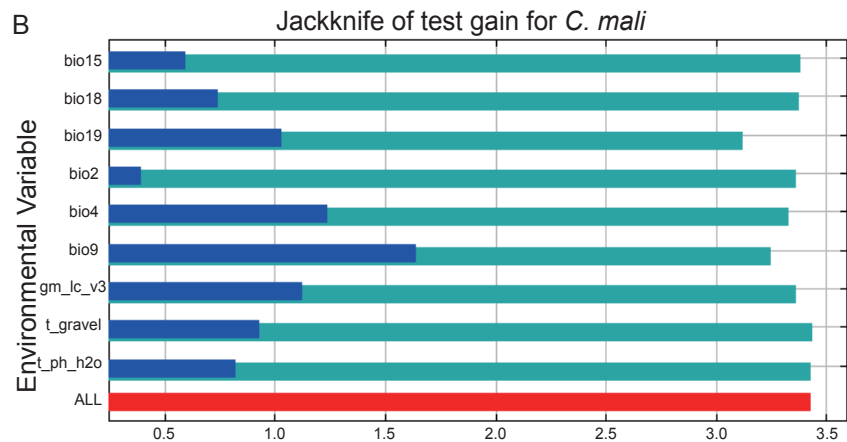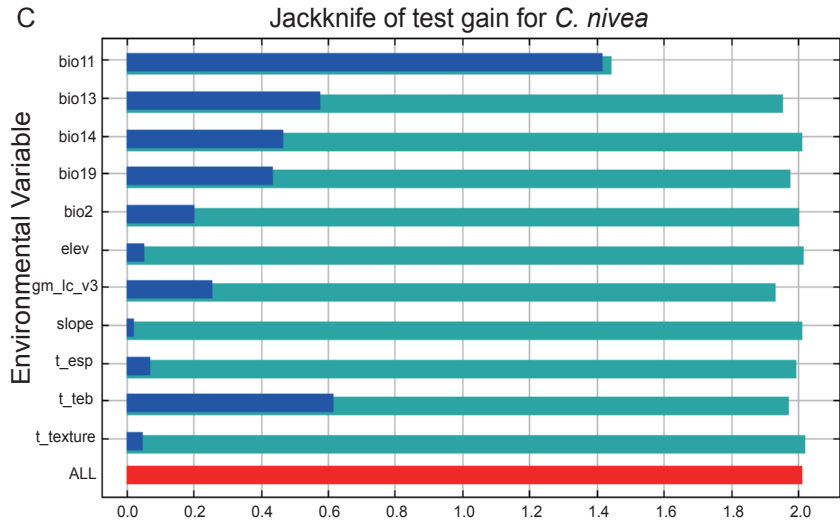

Without variable

With only variable

With all variable

Supplement: s1 [file s1]

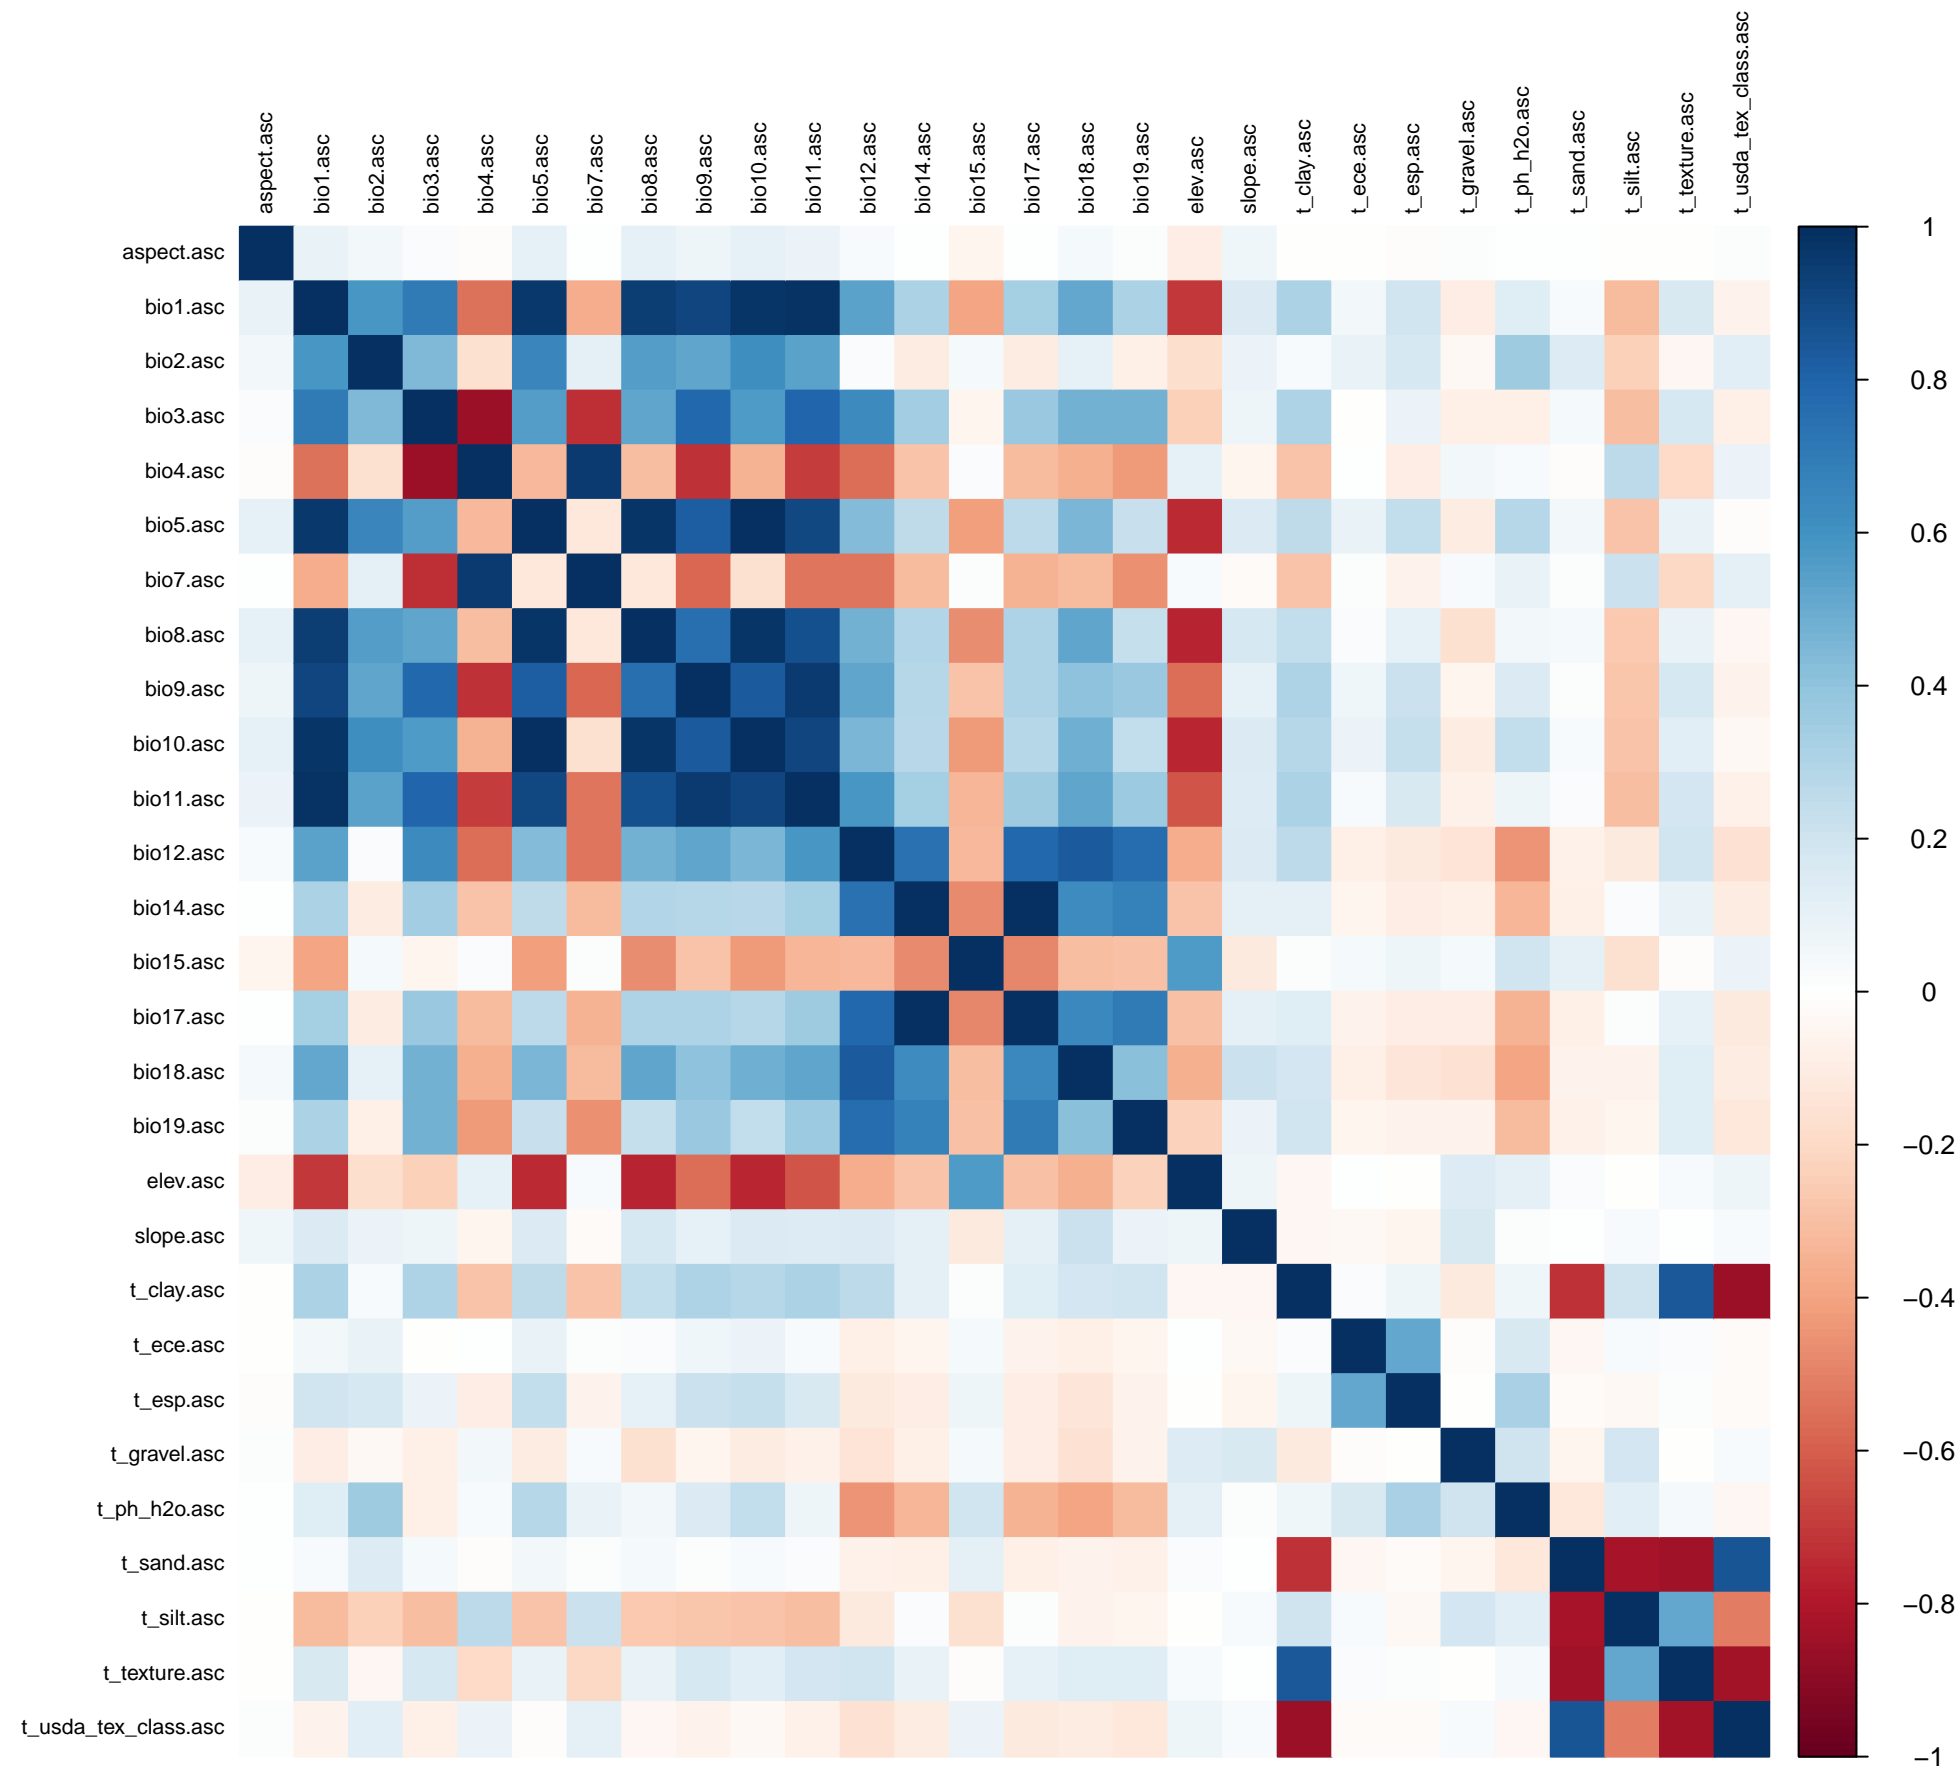

Supplement: s1 [file s1]
